# Supplementary material
Source: PubMed Central journal article supplement (PMC4785101)
Supplement: NIHMS738517-supplement-TEXT_FIGURE.pdf [file NIHMS738517-supplement-TEXT_FIGURE.pdf]

1 **Online data supplement** belonging to: **IFN- $\gamma$  Induction by Neutrophil-derived IL-17A**  
2 **Homodimer Augments Pulmonary Antibacterial Defense by Cai, *et al.***

3

4 **Methods**

5 **Infection model:** The *L. pneumophila* strain used in this study was Philadelphia 1 strain  
6 (ATCC 33152). The bacterium was grown on buffered charcoal-yeast extract (BCYE) agar for  
7 2 days at 37 °C. Bacteria were harvested by centrifugation, washed twice in sterile isotonic  
8 saline, and resuspended in saline at a concentration of  $20 \times 10^7$  CFU/ml. Mice were  
9 anesthetized with i.p. ketamine/xylazine and the trachea was exposed through a midventral  
10 incision followed by intratracheal inoculation of 50  $\mu$ l of bacteria ( $10^7$  CFU/50  $\mu$ l/mouse). The  
11 neck incision was closed with sterile staples. Control mice were inoculated intratracheally in a  
12 similar manner with 50  $\mu$ l of saline. The initial mouse inoculums were confirmed by plating  
13 serial 10-fold dilutions on BCYE agar plates.

14 **Histopathology:** Following infection, lungs were perfused from the right ventricle of heart with  
15 10 ml of saline. Lungs were excised and fixed in 4% phosphate-buffered formalin for 18 h.  
16 Fixed lung tissues were embedded in paraffin, and 5- $\mu$ m sections were cut and stained with  
17 haematoxylin and eosin. (H&E) These H&E sections were analyzed by a veterinary pathologist  
18 blinded for groups. We used the following system to score inflammation: 0, No inflammatory  
19 cells (macrophages or neutrophils) present in section; 1, <5% of section is infiltrated by  
20 inflammatory cells; 2, 5–10% of section is infiltrated by inflammatory cells; and 3, >10% of  
21 section is infiltrated by inflammatory cells. The pathological score was plotted as mean  $\pm$  SE.

22

23 **Figure Legends**

24 **Figure 1. IL-17A, IL-17F and IL-17A/F expression in C57BL/6 mice after *L. pneumophila***  
25 **infection. A.** C57BL/6 (WT) mice were i.t. challenged with *L. pneumophila* or saline (control)  
26 and lung homogenates were used to assess TNF- $\alpha$ , IL-17A, IL-17F, IL-12(p40) and IL-23(p19)  
27 mRNA levels at 6, 24, 48, and 72 h post-infection. **B.** IL-17A, IL-17F, and IL-17A/F protein  
28 levels by ELISA. Data is a representation of three individual experiments, n=4-6 mice/group; \*,  
29 p<0.05; \*\*, p<0.01; \*\*\*, p<0.001 (compared with saline treated groups). Error bars represent  
30 SE.

31 **Figure 2. Expression of IL-17A, ROR $\gamma$ t, IL-17RA, and IL-17RC in lungs following**  
32 **infection. A.** Infected lungs or saline challenged lungs were digested at 72 h, neutrophils were  
33 purified and stained with IL-17A Ab or control Ab. Representative dot plots show the %  
34 neutrophils expressing IL-17A and ROR $\gamma$ t in the lungs and the bar chart shows the average +  
35 SE of 5 mice/group. **B.** BALF from infected lungs or saline-challenged lungs were collected at  
36 72 h, neutrophils were purified and stained with IL-17A Ab or control Ab. Representative dot  
37 plots show the % neutrophils expressing IL-17A and ROR $\gamma$ t in BALF and the bar chart shows  
38 the average + SE of 5 mice/group. **C.** BALF from infected lungs at 72 h were digested,  
39 neutrophils were purified and stained with IL-17RA Ab, IL-17RC Ab, or control Ab.  
40 Representative dot plots show the % neutrophils expressing IL-17A and ROR $\gamma$ t in the lungs  
41 and the bar chart shows the average + SE of 5-6 mice/group (G). Error bars represent SE.

42 **Figure 3. Expression of IFN- $\gamma$  producing cells in the lungs following *L. pneumophila***  
43 **infection.** Flow cytometric analysis was performed on the cells obtained from whole lung  
44 digests at 24, 48, and 72 h postinfection ( $10^7$  CFU/mouse) as described in *Materials and*  
45 *Methods*. Total numbers of IFN- $\gamma$ + T cells, neutrophils, and macrophages from each lung  
46 following saline challenge or infection. For experiments A-B, a total of 5-8 mice/group were  
47 used. \*, p<0.05; \*\*, p<0.01; \*\*\*, p<0.001 (compared with 24 h *legionella* infected mice). Error  
48 bars represent SE.

49 **Figure 4. IL-17A is upstream of IFN- $\gamma$  during *L. pneumophila* infection.** Lung CFU (A) and  
50 spleen CFU (B) in *Ifng*<sup>-/-</sup> mice that received BSA or 1 mg recombinant murine IL-17A 1 hour  
51 prior to infection (n = 7 mice/group). \*, p<0.05; \*\*, p<0.01; \*\*\*, p<0.001 (compared with 24 h  
52 *legionella* infected mice). Error bars represent SE.

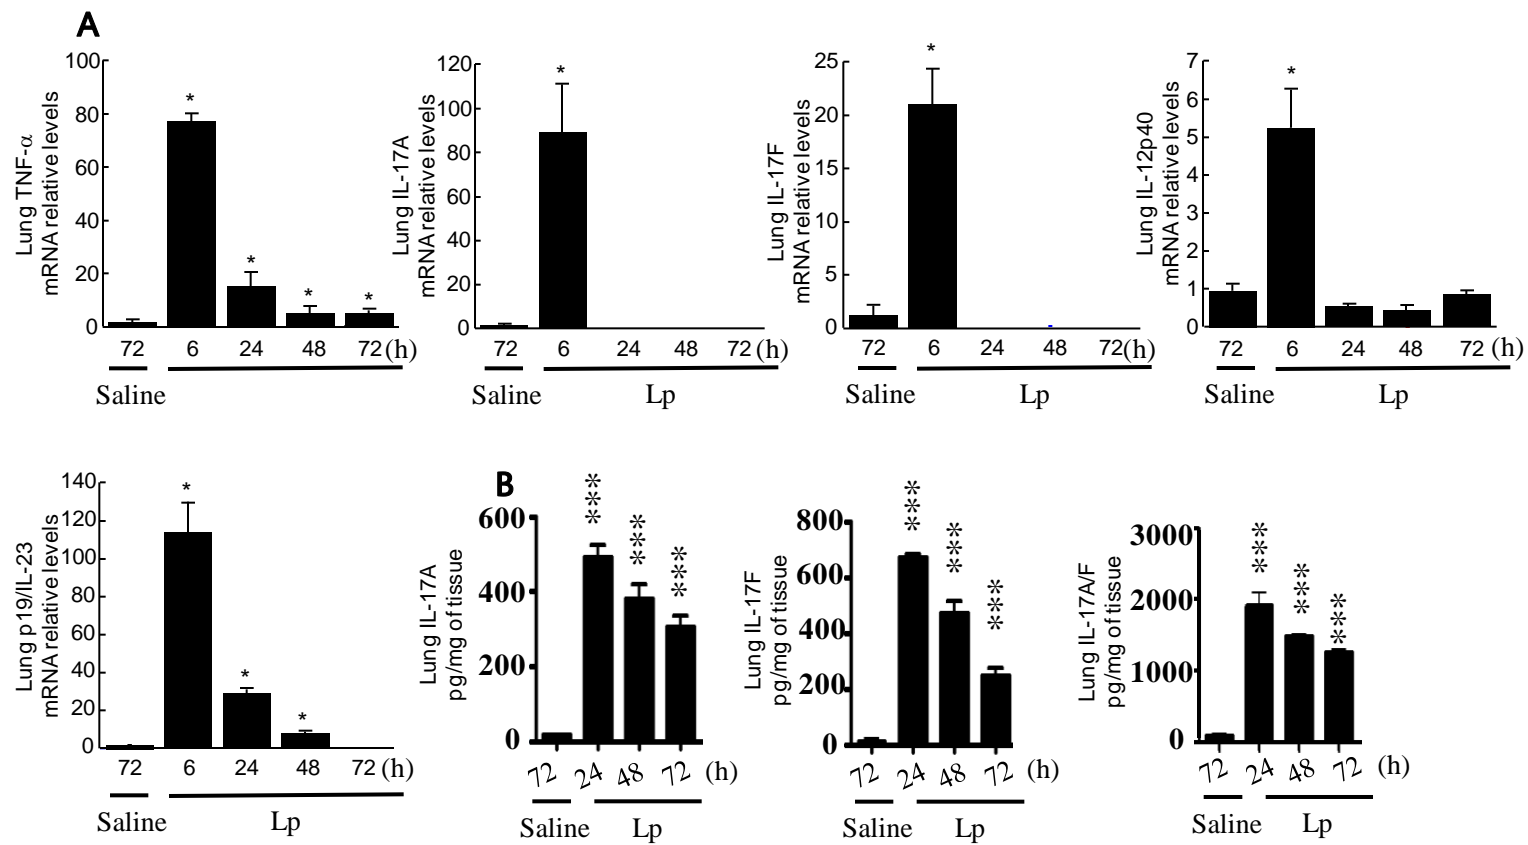

**Fig. S1**

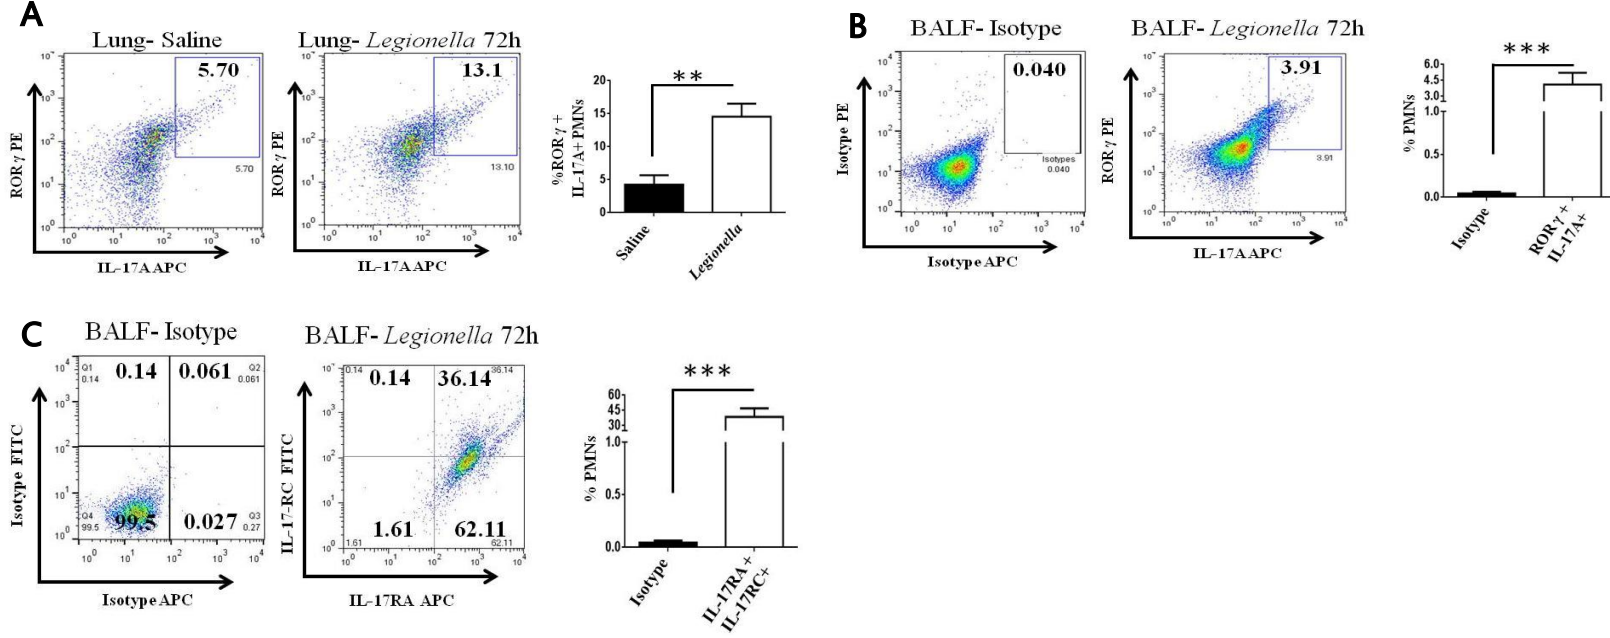

Fig. S2

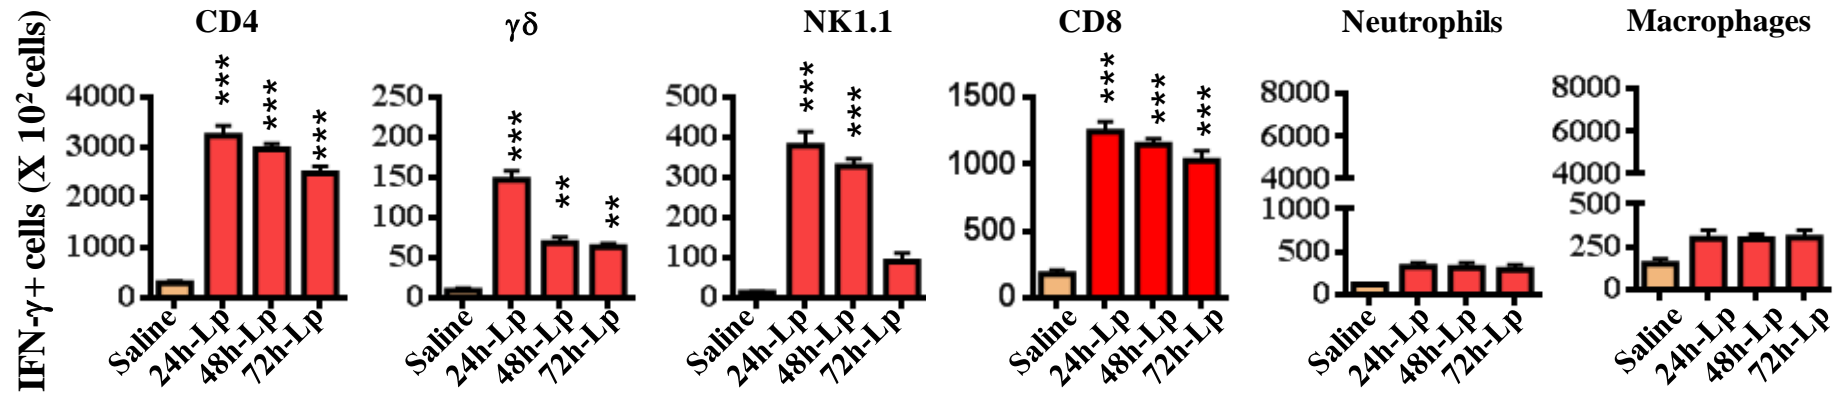

Fig. S3

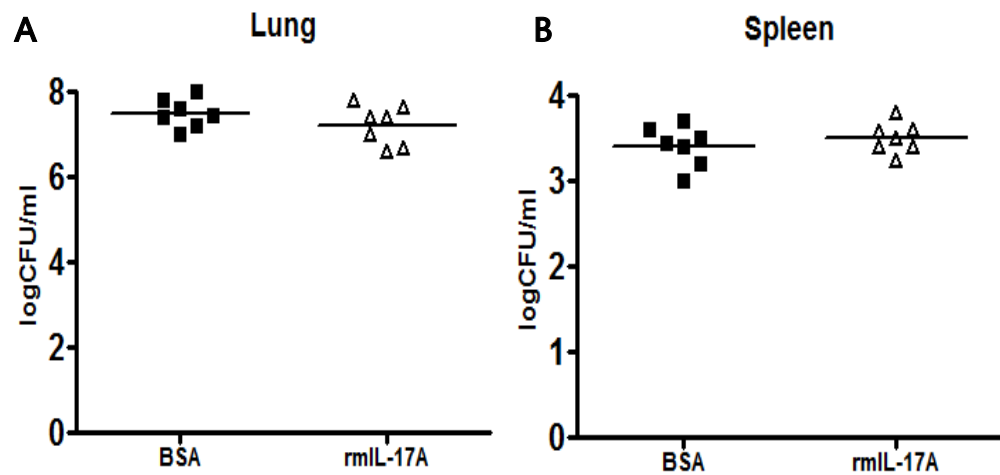

Fig. S4
